# Supplementary material for: Lorazepam Stimulates IL6 Production and Is Associated with Poor Survival Outcomes in Pancreatic Cancer
Source: PubMed Central journal article supplement — Clin Cancer Res. 2023 Aug 17;29(18):3793–812. doi: 10.1158/1078-0432.CCR-23-0547 (PMC10502465; doi:10.1158/1078-0432.ccr-23-0547), 2023-08-17
Supplement: ccr-23-0547_supplementary_figure_s1_suppfs1.pdf [file ccr-23-0547_supplementary_figure_s1_suppfs1.pdf]

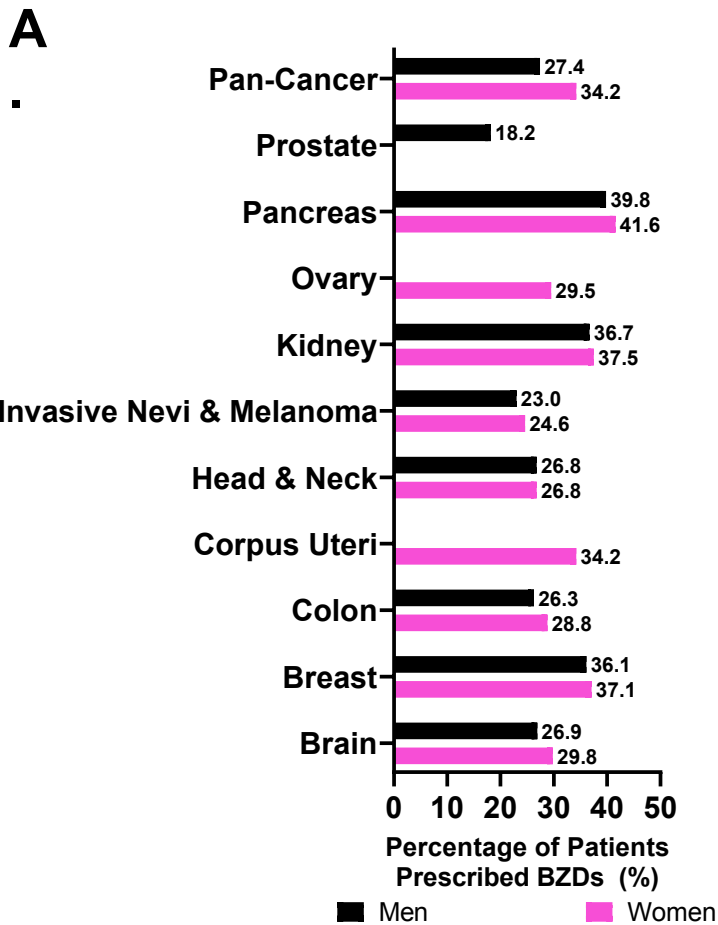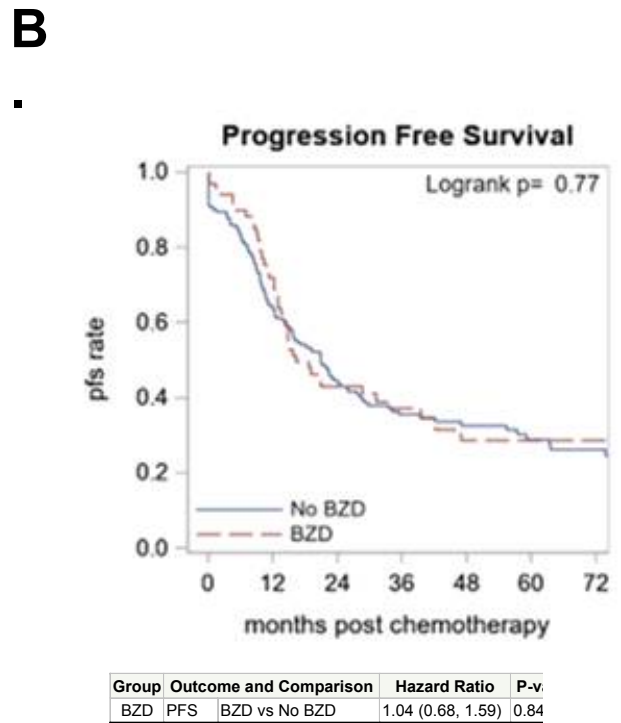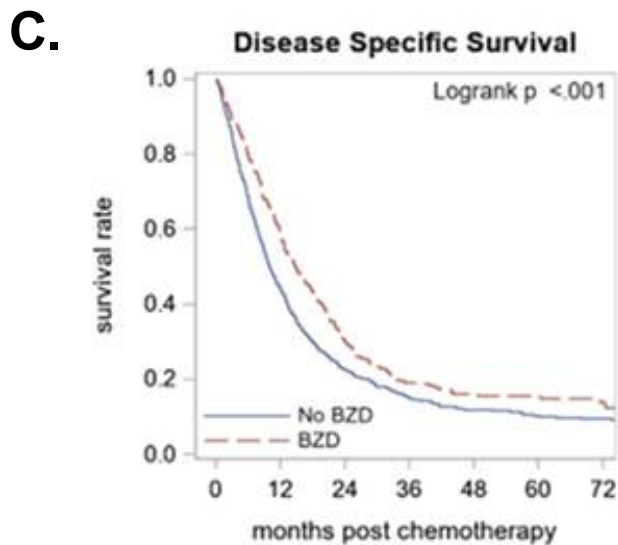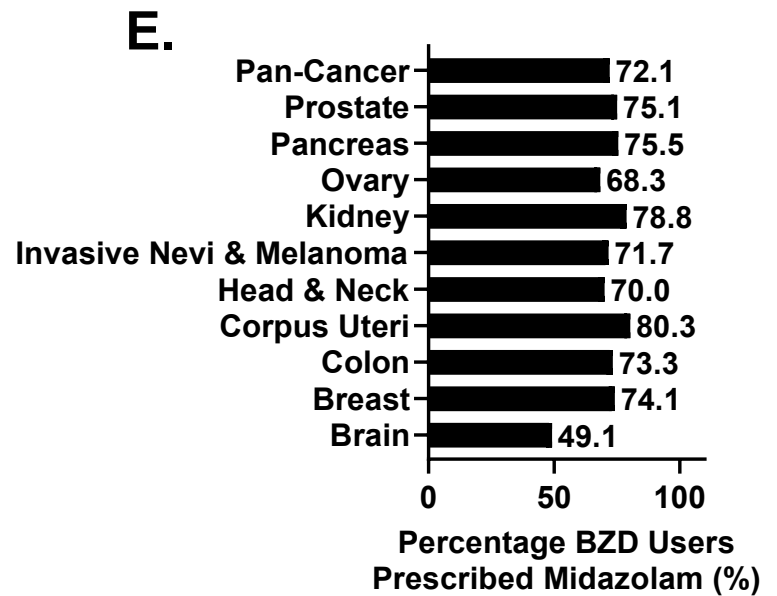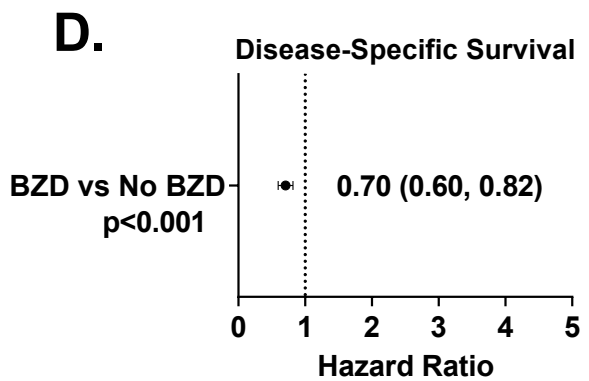

**Supplemental Figure S1. BZD prescriptions are associated with improved disease-specific pancreatic cancer patient survival.** (A) Number of patients by cancer type with a record of BZD prescriptions by cancer type in males (black bar, top) and females (pink bar, bottom). (B) Kaplan Meier curve comparing progression-free survival of pancreatic cancer

patients at Roswell Park from 2004-2020 with a record of chemotherapy with (n=69) or without (n=219) a prescription record of BZDs (excluding midazolam). (C) Kaplan Meier curve comparing disease-specific survival of pancreatic cancer patients at Roswell Park from 2004-2020 with a record of chemotherapy with (n=357) or without (n=1093) a prescription record of BZDs (excluding midazolam). (D) Covariate adjusted analysis evaluating the impact of BZD prescription records on pancreatic cancer patient disease-specific survival accounting for age, sex, race, clinical stage, additional treatments, and progressive disease. (E) Percentage of invasive nevi/melanoma, brain, breast, colon, corpus uteri, head and neck, kidney, ovarian, pancreatic, and prostate cancer patients prescribed BZDs that are receiving midazolam. Statistics: See Figure 1.
