# Supplementary material for: Lorazepam Stimulates IL6 Production and Is Associated with Poor Survival Outcomes in Pancreatic Cancer
Source: PubMed Central journal article supplement — Clin Cancer Res. 2023 Aug 17;29(18):3793–812. doi: 10.1158/1078-0432.CCR-23-0547 (PMC10502465; doi:10.1158/1078-0432.ccr-23-0547), 2023-08-17
Supplement: ccr-23-0547_supplementary_figure_s3_suppfs3.pdf [file ccr-23-0547_supplementary_figure_s3_suppfs3.pdf]

**A**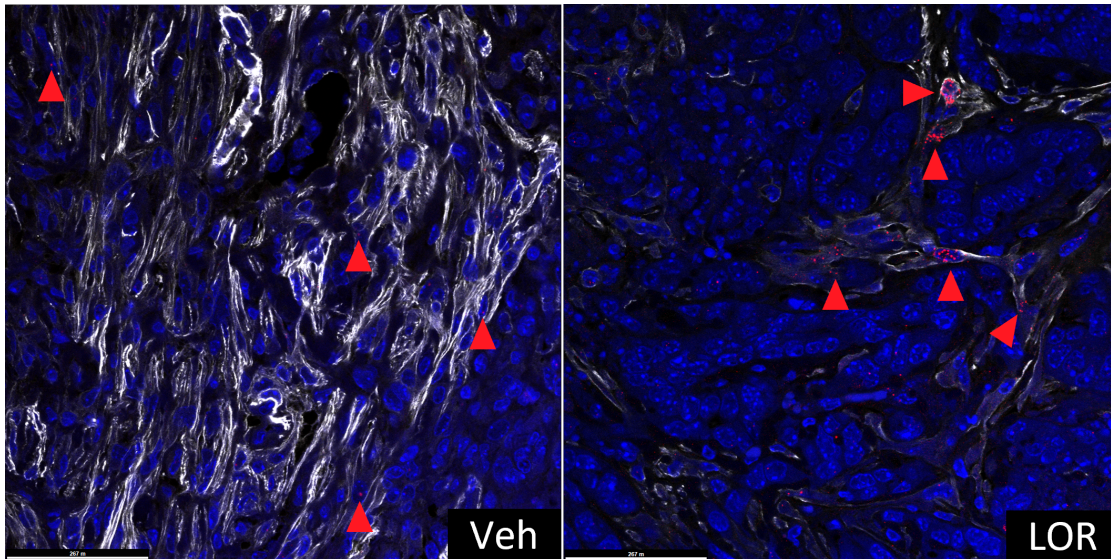**α-SMA *Il6*****B**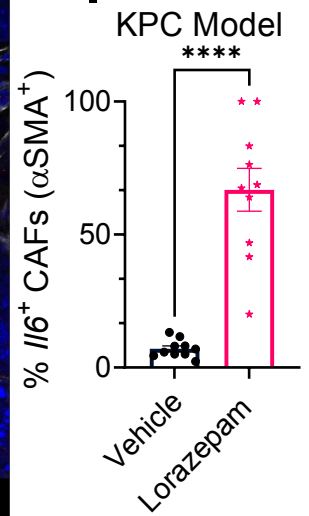**C**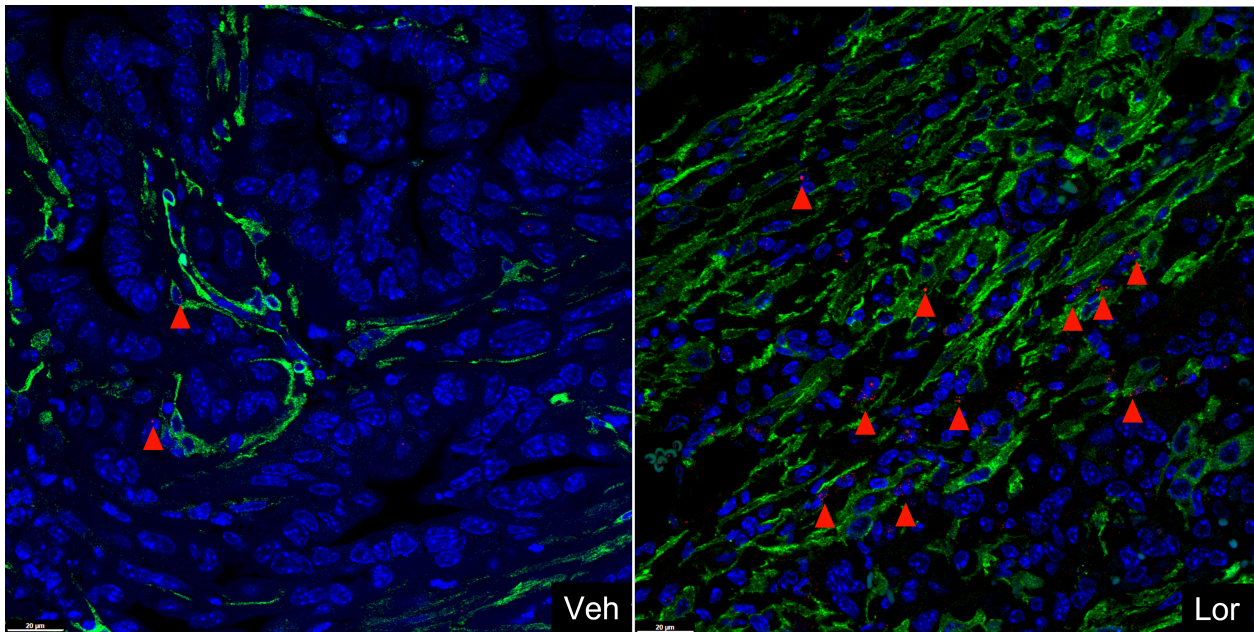**DAPI PDGFRβ *Il6***

**Supplemental Figure S3. LOR treatment promotes IL-6 expression in autochthonous KPC CAFs *in vivo*.** (A) Representative 40x RNAscope images of *Il6*<sup>+</sup>/*Acta2*<sup>+</sup> cells in the 2-week treated vehicle (left) and LOR-treated KPC tumors. (B) Quantification of (A), (C) Representative 40x RNAscope images of *Il6*<sup>+</sup>/*Pdgfrβ*<sup>+</sup> cells in the 2-week treated vehicle (left) and LOR-treated KPC subcutaneous allograft tumors.
