# Supplementary material for: Lorazepam Stimulates IL6 Production and Is Associated with Poor Survival Outcomes in Pancreatic Cancer
Source: PubMed Central journal article supplement — Clin Cancer Res. 2023 Aug 17;29(18):3793–812. doi: 10.1158/1078-0432.CCR-23-0547 (PMC10502465; doi:10.1158/1078-0432.ccr-23-0547), 2023-08-17
Supplement: ccr-23-0547_supplementary_figure_s5_suppfs5.pdf [file ccr-23-0547_supplementary_figure_s5_suppfs5.pdf]

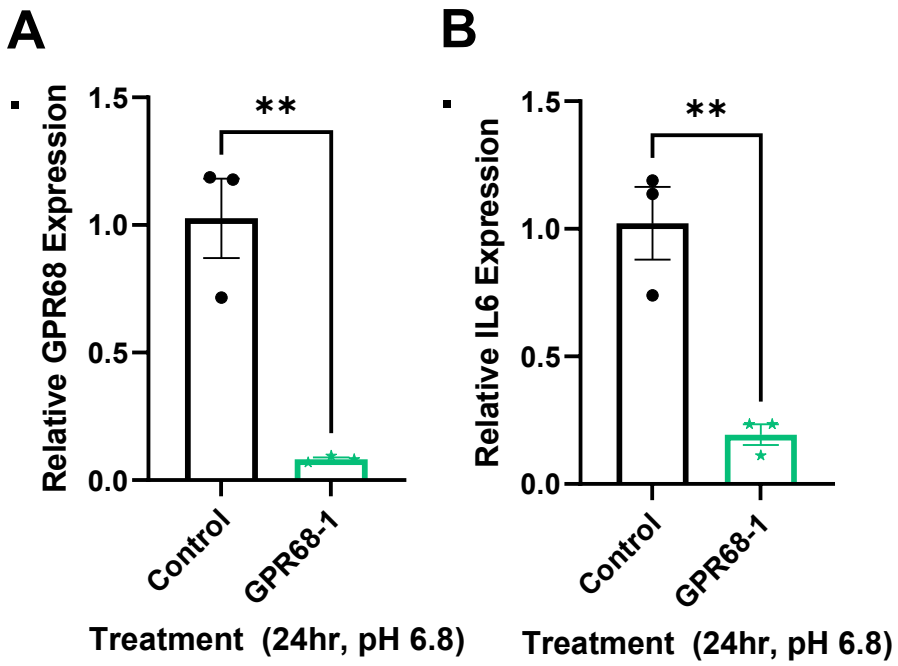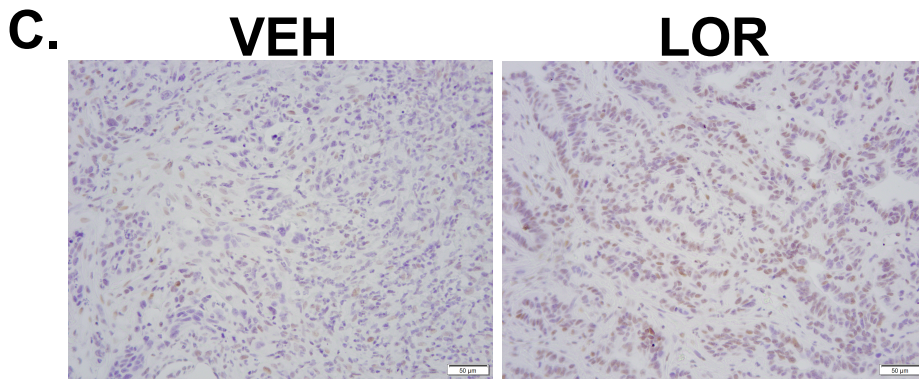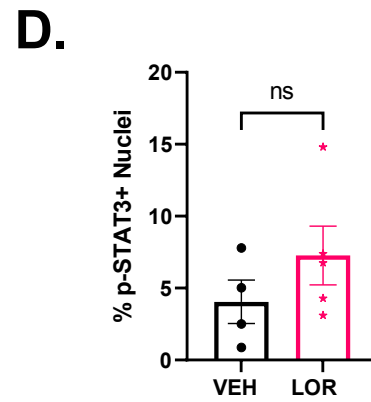

**Supplemental Figure S5. LOR treatment increases STAT3 phosphorylation.** (A) GPR68 knockdown by CRISPRi in human immortalized CAFs. (B) IL6 mRNA expression in control and GPR68 knockdown CAFs by qPCR. (C) Representative phosphor-STAT3 IHC images of the KPC syngeneic allograft tumors following 2-week vehicle (left) or LOR (right) treatment (D) Quantification of C.
