# Supplementary material for: Lorazepam Stimulates IL6 Production and Is Associated with Poor Survival Outcomes in Pancreatic Cancer
Source: PubMed Central journal article supplement — Clin Cancer Res. 2023 Aug 17;29(18):3793–812. doi: 10.1158/1078-0432.CCR-23-0547 (PMC10502465; doi:10.1158/1078-0432.ccr-23-0547), 2023-08-17
Supplement: ccr-23-0547_supplementary_table_s1_suppts1.pdf [file ccr-23-0547_supplementary_table_s1_suppts1.pdf]

**Supplementary Table S1. Pancreatic cancer patient characteristics by benzodiazepine prescription records.**

|                    |                | No BZD         | BZD            | Overall        | P-value |
|--------------------|----------------|----------------|----------------|----------------|---------|
| Overall            | N              | 1,093 (75.4)   | 357 (24.6)     | 1,450 (100%)   |         |
| Age @ Dx           | Mean/Std/N     | 66.2/10.9/1093 | 63.7/10.6/357  | 65.6/10.9/1450 | <.001   |
|                    | Median/Min/Max | 66.2/23.2/92.8 | 63.9/24.1/91.6 | 65.6/23.2/92.8 |         |
| Age @ Chemo        | Mean/Std/N     | 66.3/10.9/1093 | 63.9/10.6/357  | 65.7/10.8/1450 | <.001   |
|                    | Median/Min/Max | 66.3/23.2/93.0 | 64.1/24.1/91.6 | 65.8/23.2/93.0 |         |
| Sex                | Male           | 589 (53.9%)    | 173 (48.5%)    | 762 (52.6%)    | 0.077   |
|                    | Female         | 503 (46.1%)    | 184 (51.5%)    | 687 (47.4%)    |         |
| Race               | White          | 972 (89.9%)    | 330 (94.3%)    | 1,302 (91.0%)  | 0.012   |
|                    | Black          | 95 (8.8%)      | 14 (4.0%)      | 109 (7.6%)     |         |
|                    | Other          | 14 (1.3%)      | 6 (1.7%)       | 20 (1.4%)      |         |
| Alcohol            | Never          | 353 (35.6%)    | 111 (33.0%)    | 464 (35.0%)    | 0.679   |
|                    | Former         | 94 (9.5%)      | 32 (9.5%)      | 126 (9.5%)     |         |
|                    | Current        | 544 (54.9%)    | 193 (57.4%)    | 737 (55.5%)    |         |
| Tobacco            | Never          | 390 (35.8%)    | 133 (37.8%)    | 523 (36.3%)    | 0.675   |
|                    | Former         | 425 (39.0%)    | 138 (39.2%)    | 563 (39.1%)    |         |
|                    | Current        | 274 (25.2%)    | 81 (23.0%)     | 355 (24.6%)    |         |
| Grade              | I              | 9 (2.0%)       | 2 (2.1%)       | 11 (2.0%)      | 0.289   |
|                    | II             | 163 (35.8%)    | 39 (40.2%)     | 202 (36.6%)    |         |
|                    | III            | 211 (46.4%)    | 48 (49.5%)     | 259 (46.9%)    |         |
|                    | IV             | 72 (15.8%)     | 8 (8.2%)       | 80 (14.5%)     |         |
| Clinical Stage     | I              | 146 (15.3%)    | 59 (17.9%)     | 205 (16.0%)    | 0.604   |
|                    | II             | 164 (17.2%)    | 52 (15.8%)     | 216 (16.8%)    |         |
|                    | III            | 170 (17.8%)    | 63 (19.1%)     | 233 (18.1%)    |         |
|                    | IV             | 475 (49.7%)    | 156 (47.3%)    | 631 (49.1%)    |         |
| Path Stage         | 0              |                | 2 (1.6%)       | 2 (0.4%)       | 0.009   |
|                    | I              | 29 (8.7%)      | 4 (3.1%)       | 33 (7.2%)      |         |
|                    | II             | 173 (52.1%)    | 65 (50.8%)     | 238 (51.7%)    |         |
|                    | III            | 12 (3.6%)      | 1 (0.8%)       | 13 (2.8%)      |         |
|                    | IV             | 118 (35.5%)    | 56 (43.8%)     | 174 (37.8%)    |         |
| Nodes Examined     | Mean/Std/N     | 4.6/9.4/1060   | 4.8/10.4/352   | 4.6/9.6/1412   | 0.988   |
|                    | Median/Min/Max | 0.0/0.0/47.0   | 0.0/0.0/71.0   | 0.0/0.0/71.0   |         |
| Nodes Positive     | Mean/Std/N     | 2.2/3.0/266    | 2.2/2.7/87     | 2.2/3.0/353    | 0.419   |
|                    | Median/Min/Max | 1.0/0.0/18.0   | 1.0/0.0/12.0   | 1.0/0.0/18.0   |         |
| Nodes              | Negative       | 105 (39.5%)    | 27 (31.0%)     | 132 (37.4%)    | 0.163   |
|                    | Positive       | 161 (60.5%)    | 60 (69.0%)     | 221 (62.6%)    |         |
| Persistent Disease | No             | 219 (20.0%)    | 69 (19.3%)     | 288 (19.9%)    | 0.819   |
|                    | Yes            | 874 (80.0%)    | 288 (80.7%)    | 1,162 (80.1%)  |         |

**Tx:Surgery refers to all surgical procedures including biopsies and partial resections**
