# Supplementary material for: Lorazepam Stimulates IL6 Production and Is Associated with Poor Survival Outcomes in Pancreatic Cancer
Source: PubMed Central journal article supplement — Clin Cancer Res. 2023 Aug 17;29(18):3793–812. doi: 10.1158/1078-0432.CCR-23-0547 (PMC10502465; doi:10.1158/1078-0432.ccr-23-0547), 2023-08-17
Supplement: ccr-23-0547_supplementary_table_s2_suppts2.pdf [file ccr-23-0547_supplementary_table_s2_suppts2.pdf]

**Supplementary Table S2. Pancreatic cancer patient characteristics by lorazepam prescription records.**

|                    |                         | No             | Yes            | P-value |
|--------------------|-------------------------|----------------|----------------|---------|
| Overall            | N                       | 141 (39.5)     | 216 (60.5)     |         |
| Age @ Dx           | Mean/Std/N              | 65.3/9.8/141   | 62.7/11.0/216  | 0.060   |
|                    | Median/Min/Max          | 65.1/36.2/91.6 | 63.1/24.1/84.6 |         |
| Age @ Chemo        | Mean/Std/N              | 65.4/9.7/141   | 62.9/11.0/216  | 0.061   |
|                    | Median/Min/Max          | 65.1/39.3/91.6 | 63.2/24.1/84.7 |         |
| Sex                | Male                    | 76 (53.9%)     | 97 (44.9%)     | 0.105   |
|                    | Female                  | 65 (46.1%)     | 119 (55.1%)    |         |
| Race               | White                   | 125 (90.6%)    | 205 (96.7%)    | 0.037   |
|                    | Black                   | 10 (7.2%)      | 4 (1.9%)       |         |
|                    | Other                   | 3 (2.2%)       | 3 (1.4%)       |         |
| Alcohol            | Never                   | 39 (29.8%)     | 72 (35.1%)     | 0.005   |
|                    | Former                  | 21 (16.0%)     | 11 (5.4%)      |         |
|                    | Current                 | 71 (54.2%)     | 122 (59.5%)    |         |
| Tobacco            | Never                   | 49 (35.5%)     | 84 (39.3%)     | 0.652   |
|                    | Former                  | 54 (39.1%)     | 84 (39.3%)     |         |
|                    | Current                 | 35 (25.4%)     | 46 (21.5%)     |         |
| Grade              | I                       |                | 2 (3.6%)       | 0.618   |
|                    | II                      | 18 (43.9%)     | 21 (37.5%)     |         |
|                    | III                     | 20 (48.8%)     | 28 (50.0%)     |         |
|                    | IV                      | 3 (7.3%)       | 5 (8.9%)       |         |
| Clinical Stage     | I                       | 24 (18.2%)     | 35 (17.7%)     | 0.999   |
|                    | II                      | 21 (15.9%)     | 31 (15.7%)     |         |
|                    | III                     | 25 (18.9%)     | 38 (19.2%)     |         |
|                    | IV                      | 62 (47.0%)     | 94 (47.5%)     |         |
| Path Stage         | 0                       | 1 (1.9%)       | 1 (1.3%)       | 0.756   |
|                    | I                       | 2 (3.8%)       | 2 (2.6%)       |         |
|                    | II                      | 29 (55.8%)     | 36 (47.4%)     |         |
|                    | III                     |                | 1 (1.3%)       |         |
|                    | IV                      | 20 (38.5%)     | 36 (47.4%)     |         |
| Nodes Examined     | Mean/Std/N              | 5.5/11.5/140   | 4.4/9.6/212    | 0.210   |
|                    | Median/Min/Max          | 0.0/0.0/71.0   | 0.0/0.0/47.0   |         |
| Nodes Positive     | Mean/Std/N              | 1.9/2.4/40     | 2.6/2.8/47     | 0.208   |
|                    | Median/Min/Max          | 1.0/0.0/10.0   | 2.0/0.0/12.0   |         |
| Nodes              | Negative                | 14 (35.0%)     | 13 (27.7%)     | 0.493   |
|                    | Positive                | 26 (65.0%)     | 34 (72.3%)     |         |
| Persistent Disease | No                      | 29 (20.6%)     | 40 (18.5%)     | 0.681   |
|                    | Yes                     | 112 (79.4%)    | 176 (81.5%)    |         |
| Tx: XRT            | No                      | 117 (83.0%)    | 173 (80.1%)    | 0.580   |
|                    | Yes                     | 24 (17.0%)     | 43 (19.9%)     |         |
| Tx: Immuno         | No                      | 136 (96.5%)    | 207 (95.8%)    | 1.000   |
|                    | Yes                     | 5 (3.5%)       | 9 (4.2%)       |         |
| Tx: Hormone        | No                      | 137 (97.2%)    | 211 (97.7%)    | 0.744   |
|                    | Yes                     | 4 (2.8%)       | 5 (2.3%)       |         |
| Tx: Surgery        | No                      | 11 (7.8%)      | 20 (9.3%)      | 0.703   |
|                    | Yes                     | 130 (92.2%)    | 196 (90.7%)    |         |
| Timing of BZD      | Prior to Start of Chemo | 79 (56.0%)     | 78 (36.1%)     | <.001   |
|                    | After Start of Chemo    | 59 (41.8%)     | 138 (63.9%)    |         |
|                    | At Start of Chemo       | 3 (2.1%)       |                |         |

**Tx:Surgery refers to all surgical procedures including biopsies and partial resections**
