# Supplementary material for: Lorazepam Stimulates IL6 Production and Is Associated with Poor Survival Outcomes in Pancreatic Cancer
Source: PubMed Central journal article supplement — Clin Cancer Res. 2023 Aug 17;29(18):3793–812. doi: 10.1158/1078-0432.CCR-23-0547 (PMC10502465; doi:10.1158/1078-0432.ccr-23-0547), 2023-08-17
Supplement: ccr-23-0547_supplementary_table_s3_suppts3.pdf [file ccr-23-0547_supplementary_table_s3_suppts3.pdf]

**Supplementary Table S3. Pancreatic cancer patient characteristics by alprazolam prescription records.**

|                    |                         | No             | Yes            | P-value |
|--------------------|-------------------------|----------------|----------------|---------|
| Overall            | N                       | 225 (63.0)     | 132 (37.0)     |         |
| Age @ Dx           | Mean/Std/N              | 63.4/10.6/225  | 64.3/10.8/132  | 0.619   |
|                    | Median/Min/Max          | 63.2/24.1/83.5 | 64.1/35.5/91.6 |         |
| Age @ Chemo        | Mean/Std/N              | 63.6/10.5/225  | 64.4/10.8/132  | 0.675   |
|                    | Median/Min/Max          | 63.4/24.1/83.8 | 64.5/35.7/91.6 |         |
| Sex                | Male                    | 116 (51.6%)    | 57 (43.2%)     | 0.154   |
|                    | Female                  | 109 (48.4%)    | 75 (56.8%)     |         |
| Race               | White                   | 209 (95.0%)    | 121 (93.1%)    | 0.588   |
|                    | Black                   | 7 (3.2%)       | 7 (5.4%)       |         |
|                    | Other                   | 4 (1.8%)       | 2 (1.5%)       |         |
| Alcohol            | Never                   | 70 (32.6%)     | 41 (33.9%)     | 0.940   |
|                    | Former                  | 20 (9.3%)      | 12 (9.9%)      |         |
|                    | Current                 | 125 (58.1%)    | 68 (56.2%)     |         |
| Tobacco            | Never                   | 89 (40.1%)     | 44 (33.8%)     | 0.242   |
|                    | Former                  | 88 (39.6%)     | 50 (38.5%)     |         |
|                    | Current                 | 45 (20.3%)     | 36 (27.7%)     |         |
| Grade              | I                       | 2 (3.2%)       |                | 0.354   |
|                    | II                      | 27 (43.5%)     | 12 (34.3%)     |         |
|                    | III                     | 27 (43.5%)     | 21 (60.0%)     |         |
|                    | IV                      | 6 (9.7%)       | 2 (5.7%)       |         |
| Clinical Stage     | I                       | 40 (19.3%)     | 19 (15.4%)     | 0.097   |
|                    | II                      | 33 (15.9%)     | 19 (15.4%)     |         |
|                    | III                     | 31 (15.0%)     | 32 (26.0%)     |         |
|                    | IV                      | 103 (49.8%)    | 53 (43.1%)     |         |
| Path Stage         | 0                       | 1 (1.3%)       | 1 (2.1%)       | 0.908   |
|                    | I                       | 2 (2.5%)       | 2 (4.2%)       |         |
|                    | II                      | 41 (51.3%)     | 24 (50.0%)     |         |
|                    | III                     | 1 (1.3%)       |                |         |
|                    | IV                      | 35 (43.8%)     | 21 (43.8%)     |         |
| Nodes Examined     | Mean/Std/N              | 4.4/9.5/223    | 5.6/11.8/129   | 0.201   |
|                    | Median/Min/Max          | 0.0/0.0/50.0   | 0.0/0.0/71.0   |         |
| Nodes Positive     | Mean/Std/N              | 2.7/2.9/50     | 1.6/2.3/37     | 0.081   |
|                    | Median/Min/Max          | 2.0/0.0/12.0   | 1.0/0.0/10.0   |         |
| Nodes              | Negative                | 14 (28.0%)     | 13 (35.1%)     | 0.492   |
|                    | Positive                | 36 (72.0%)     | 24 (64.9%)     |         |
| Persistent Disease | No                      | 42 (18.7%)     | 27 (20.5%)     | 0.679   |
|                    | Yes                     | 183 (81.3%)    | 105 (79.5%)    |         |
| Tx: XRT            | No                      | 177 (78.7%)    | 113 (85.6%)    | 0.123   |
|                    | Yes                     | 48 (21.3%)     | 19 (14.4%)     |         |
| Tx: Immuno         | No                      | 213 (94.7%)    | 130 (98.5%)    | 0.092   |
|                    | Yes                     | 12 (5.3%)      | 2 (1.5%)       |         |
| Tx: Hormone        | No                      | 218 (96.9%)    | 130 (98.5%)    | 0.494   |
|                    | Yes                     | 7 (3.1%)       | 2 (1.5%)       |         |
| Tx: Surgery        | No                      | 19 (8.4%)      | 12 (9.1%)      | 0.847   |
|                    | Yes                     | 206 (91.6%)    | 120 (90.9%)    |         |
| Timing of BZD      | Prior to Start of Chemo | 84 (37.3%)     | 73 (55.3%)     | <.001   |
|                    | After Start of Chemo    | 141 (62.7%)    | 56 (42.4%)     |         |
|                    | At Start of Chemo       |                | 3 (2.3%)       |         |

**Tx:Surgery refers to all surgical procedures including biopsies and partial resections**
