# Supplementary material for: Lorazepam Stimulates IL6 Production and Is Associated with Poor Survival Outcomes in Pancreatic Cancer
Source: PubMed Central journal article supplement — Clin Cancer Res. 2023 Aug 17;29(18):3793–812. doi: 10.1158/1078-0432.CCR-23-0547 (PMC10502465; doi:10.1158/1078-0432.ccr-23-0547), 2023-08-17
Supplement: ccr-23-0547_supplementary_table_s4_suppts4.pdf [file ccr-23-0547_supplementary_table_s4_suppts4.pdf]

**Supplementary Table S4. RNAscope Antibodies and Probes.**

| <b>Antibody/Probe</b> | <b>Company</b>    | <b>Catalog #</b> | <b>Dilution</b>              |
|-----------------------|-------------------|------------------|------------------------------|
| $\alpha$ SMA          | Sigma             | A2547            | 1:400                        |
| Mm- <i>Gpr68</i>      | ACD<br>Biosystems | 319321           | According to<br>manufacturer |
| Mm- <i>Ilf6-C2</i>    | ACD<br>Biosystems | 315891-C2        | According to<br>manufacturer |
| PDGFR $\beta$         | Abcam             | 32570            | 1:100                        |
