# Supplementary material for: Lorazepam Stimulates IL6 Production and Is Associated with Poor Survival Outcomes in Pancreatic Cancer
Source: PubMed Central journal article supplement — Clin Cancer Res. 2023 Aug 17;29(18):3793–812. doi: 10.1158/1078-0432.CCR-23-0547 (PMC10502465; doi:10.1158/1078-0432.ccr-23-0547), 2023-08-17
Supplement: ccr-23-0547_supplementary_table_s5_suppts5.pdf [file ccr-23-0547_supplementary_table_s5_suppts5.pdf]

**Supplementary Table S5. Pancreatic Cancer Time-to-Event Outcomes: Multivariate Summaries.**

| Group    | Outcome and Comparison |              | Hazard Ratio      | P-value |
|----------|------------------------|--------------|-------------------|---------|
| BZD      | DFS                    | BZD vs NoBZD | 0.98 (0.86, 1.12) | 0.771   |
|          | DSS                    | BZD vs NoBZD | 0.70 (0.60, 0.82) | <.001   |
|          | OS                     | BZD vs NoBZD | 0.73 (0.63, 0.84) | <.001   |
|          | PFS                    | BZD vs NoBZD | 1.04 (0.68, 1.59) | 0.848   |
| BZD: LOR | DFS                    | Yes vs No    | 1.09 (0.85, 1.39) | 0.497   |
|          | DSS                    | Yes vs No    | 1.07 (0.80, 1.42) | 0.667   |
|          | OS                     | Yes vs No    | 1.04 (0.79, 1.35) | 0.796   |
|          | PFS                    | Yes vs No    | 3.83 (1.53, 9.57) | 0.004   |
| BZD: ALP | DFS                    | Yes vs No    | 0.88 (0.69, 1.12) | 0.305   |
|          | DSS                    | Yes vs No    | 0.99 (0.74, 1.31) | 0.921   |
|          | OS                     | Yes vs No    | 0.97 (0.75, 1.26) | 0.838   |
|          | PFS                    | Yes vs No    | 0.38 (0.16, 0.92) | 0.032   |

**DFS: Disease-Free Survival, DSS: Disease-Specific Survival, OS: Overall Survival, PFS: Progression-Free Survival**
