# Supplementary material for: Lorazepam Stimulates IL6 Production and Is Associated with Poor Survival Outcomes in Pancreatic Cancer
Source: PubMed Central journal article supplement — Clin Cancer Res. 2023 Aug 17;29(18):3793–812. doi: 10.1158/1078-0432.CCR-23-0547 (PMC10502465; doi:10.1158/1078-0432.ccr-23-0547), 2023-08-17
Supplement: ccr-23-0547_supplementary_table_s6_suppts6.pdf [file ccr-23-0547_supplementary_table_s6_suppts6.pdf]

## Supplementary Table S6. Brain cancer patient characteristics, median survival, and Multivariate Cox Regression Modeling.

| Patient Characteristics (Brain)     |                | LOR         | ALP        | No Benzo     | Overall     | P-value |
|-------------------------------------|----------------|-------------|------------|--------------|-------------|---------|
|                                     | N              | 153 (23.0)  | 34 (5.1)   | 477 (71.8)   | 664 (100%)  |         |
| Sex                                 | Female         | 74 (48.4%)  | 13 (38.2%) | 212 (44.4%)  | 299 (45.0%) | 0.500   |
|                                     | Male           | 79 (51.6%)  | 21 (61.8%) | 265 (55.6%)  | 365 (55.0%) |         |
| Grade (Clinical)                    | I              | 1 (0.8%)    |            | 6 (1.3%)     | 7 (1.1%)    | 0.379   |
|                                     | II             | 7 (5.4%)    |            | 10 (2.1%)    | 17 (2.7%)   |         |
|                                     | III            | 5 (3.9%)    | 1 (3.3%)   | 16 (3.4%)    | 22 (3.5%)   |         |
|                                     | IV             | 32 (24.8%)  | 8 (26.7%)  | 93 (19.5%)   | 133 (20.9%) |         |
|                                     | Not Reported   | 84 (65.1%)  | 21 (70.0%) | 351 (73.7%)  | 456 (71.8%) |         |
| Grade (Pathological)                | I              | 2 (1.5%)    |            | 5 (1.1%)     | 7 (1.1%)    | 0.003   |
|                                     | II             | 8 (6.0%)    |            | 10 (2.1%)    | 18 (2.8%)   |         |
|                                     | III            | 4 (3.0%)    | 2 (6.5%)   | 16 (3.4%)    | 22 (3.4%)   |         |
|                                     | IV             | 44 (33.1%)  | 11 (35.5%) | 94 (19.7%)   | 149 (23.3%) |         |
|                                     | Not Reported   | 75 (56.4%)  | 18 (58.1%) | 351 (73.7%)  | 444 (69.4%) |         |
| Stage (Clinical)                    | I              | 16 (10.5%)  |            |              | 16 (2.4%)   | <.001   |
|                                     | IV             |             | 1 (3.0%)   |              | 1 (0.2%)    |         |
|                                     | Not Reported   | 137 (89.5%) | 32 (97.0%) | 477 (100.0%) | 646 (97.4%) |         |
| Stage (Pathological)                | I              | 1 (0.7%)    |            |              | 1 (0.2%)    | <.001   |
|                                     | IV             |             | 1 (3.0%)   |              | 1 (0.2%)    |         |
|                                     | Not Reported   | 152 (99.3%) | 32 (97.0%) | 477 (100.0%) | 661 (99.7%) |         |
| Overall Survival Indicator          | Alive          | 48 (31.4%)  | 10 (29.4%) | 94 (19.7%)   | 152 (22.9%) | 0.007   |
|                                     | Dead           | 105 (68.6%) | 24 (70.6%) | 383 (80.3%)  | 512 (77.1%) |         |
| Progression-Free Survival Indicator | No Progression | 45 (29.4%)  | 9 (26.5%)  | 89 (18.7%)   | 143 (21.5%) | 0.015   |
|                                     | Progression    | 108 (70.6%) | 25 (73.5%) | 388 (81.3%)  | 521 (78.5%) |         |

| Overall Survival (OS) | Median Surv. (95% CI) | Sample: Brain     | Log Rank P-value |
|-----------------------|-----------------------|-------------------|------------------|
| Total                 | 16.6 (14.8, 18.3)     | E=512 C=152 T=664 | p= 0.038         |
| ALP                   | 13.4 (7.9, 56.2)      | E=24 C=10 T=34    |                  |
| LOR                   | 20.6 (15.6, 34.4)     | E=105 C=48 T=153  |                  |
| No Benzo              | 16.1 (14.2, 17.7)     | E=383 C=94 T=477  |                  |

| Progression-Free Survival (PFS) | Median Surv. (95% CI) | Sample: Brain     | Log Rank P-value |
|---------------------------------|-----------------------|-------------------|------------------|
| Total                           | 14.9 (13.6, 16.7)     | E=521 C=143 T=664 | p= 0.117         |
| ALP                             | 13.4 (7.9, 24.9)      | E=25 C=9 T=34     |                  |
| LOR                             | 16.7 (13.8, 28.5)     | E=108 C=45 T=153  |                  |
| No Benzo                        | 14.5 (12.7, 16.4)     | E=388 C=89 T=477  |                  |

| Overall Survival (OS)                                       |                       |         |
|-------------------------------------------------------------|-----------------------|---------|
| Predictors: Cohort, Sex, Clinical Grade, and Clinical Stage |                       |         |
| Cohort                                                      | HR (95% CI)           | P-value |
| No Benzo                                                    | Ref.                  | 0.0357  |
| ALP                                                         | 0.661 (0.414 – 1.055) | 0.0829  |
| LOR                                                         | 0.779 (0.616 – 0.986) | 0.0381  |
| Progression-Free Survival (PFS)                             |                       |         |
| No Benzo                                                    | Ref.                  | 0.1633  |
| ALP                                                         | 0.767 (0.492 – 1.195) | 0.2407  |
| LOR                                                         | 0.826 (0.655 – 1.043) | 0.1080  |

E= event, C= censored, T= Total
