# Supplementary material for: Lorazepam Stimulates IL6 Production and Is Associated with Poor Survival Outcomes in Pancreatic Cancer
Source: PubMed Central journal article supplement — Clin Cancer Res. 2023 Aug 17;29(18):3793–812. doi: 10.1158/1078-0432.CCR-23-0547 (PMC10502465; doi:10.1158/1078-0432.ccr-23-0547), 2023-08-17
Supplement: ccr-23-0547_supplementary_table_s7_suppts7.pdf [file ccr-23-0547_supplementary_table_s7_suppts7.pdf]

**Supplementary Table S7. Breast cancer patient characteristics, median survival, and Multivariate Cox Regression Modeling.**

| Patient Characteristics (Breast)    |                | LOR         | ALP         | No Benzo      | Overall       | P-value |
|-------------------------------------|----------------|-------------|-------------|---------------|---------------|---------|
|                                     | N              | 559 (24.0)  | 362 (15.5)  | 1,411 (60.5)  | 2,332 (100%)  |         |
| Sex                                 | Female         | 555 (99.3%) | 360 (99.4%) | 1,404 (99.5%) | 2,319 (99.4%) | 0.840   |
|                                     | Male           | 4 (0.7%)    | 2 (0.6%)    | 7 (0.5%)      | 13 (0.6%)     |         |
| Grade (Clinical)                    | I              | 51 (9.3%)   | 78 (21.9%)  | 259 (18.7%)   | 388 (16.9%)   | <.001   |
|                                     | II             | 193 (35.1%) | 134 (37.6%) | 535 (38.5%)   | 862 (37.6%)   |         |
|                                     | III            | 258 (46.9%) | 100 (28.1%) | 382 (27.5%)   | 740 (32.3%)   |         |
|                                     | IV             |             |             | 2 (0.1%)      | 2 (0.1%)      |         |
|                                     | Not Reported   | 48 (8.7%)   | 44 (12.4%)  | 210 (15.1%)   | 302 (13.2%)   |         |
| Grade (Pathological)                | I              | 49 (8.9%)   | 76 (21.3%)  | 257 (18.5%)   | 382 (16.6%)   | <.001   |
|                                     | II             | 186 (33.8%) | 130 (36.5%) | 515 (37.1%)   | 831 (36.2%)   |         |
|                                     | III            | 249 (45.3%) | 94 (26.4%)  | 362 (26.1%)   | 705 (30.7%)   |         |
|                                     | IV             |             |             | 2 (0.1%)      | 2 (0.1%)      |         |
|                                     | Not Reported   | 66 (12.0%)  | 56 (15.7%)  | 253 (18.2%)   | 375 (16.3%)   |         |
| Stage (Clinical)                    | 0              | 24 (4.3%)   | 32 (8.9%)   | 120 (8.5%)    | 176 (7.6%)    | <.001   |
|                                     | I              | 137 (24.5%) | 97 (27.0%)  | 395 (28.1%)   | 629 (27.1%)   |         |
|                                     | II             | 127 (22.7%) | 37 (10.3%)  | 189 (13.4%)   | 353 (15.2%)   |         |
|                                     | III            | 29 (5.2%)   | 6 (1.7%)    | 51 (3.6%)     | 86 (3.7%)     |         |
|                                     | IV             | 47 (8.4%)   | 8 (2.2%)    | 75 (5.3%)     | 130 (5.6%)    |         |
|                                     | Not Reported   | 195 (34.9%) | 179 (49.9%) | 576 (41.0%)   | 950 (40.9%)   |         |
| Stage (Pathological)                | 0              | 16 (2.9%)   | 28 (7.8%)   | 130 (9.4%)    | 174 (7.6%)    | <.001   |
|                                     | I              | 124 (22.4%) | 104 (29.1%) | 459 (33.1%)   | 687 (29.9%)   |         |
|                                     | II             | 124 (22.4%) | 36 (10.1%)  | 208 (15.0%)   | 368 (16.0%)   |         |
|                                     | III            | 62 (11.2%)  | 10 (2.8%)   | 80 (5.8%)     | 152 (6.6%)    |         |
|                                     | IV             | 11 (2.0%)   | 1 (0.3%)    | 25 (1.8%)     | 37 (1.6%)     |         |
|                                     | Not Reported   | 216 (39.1%) | 179 (50.0%) | 483 (34.9%)   | 878 (38.2%)   |         |
| Overall Survival Indicator          | Alive          | 349 (62.4%) | 227 (62.7%) | 1,021 (72.4%) | 1,597 (68.5%) | <.001   |
|                                     | Dead           | 210 (37.6%) | 135 (37.3%) | 390 (27.6%)   | 735 (31.5%)   |         |
| Progression-Free Survival Indicator | No Progression | 332 (59.4%) | 220 (60.8%) | 1,000 (70.9%) | 1,552 (66.6%) | <.001   |
|                                     | Progression    | 227 (40.6%) | 142 (39.2%) | 411 (29.1%)   | 780 (33.4%)   |         |

| Overall Survival (OS) | Median Surv. (95% CI) | Sample: Breast      | Log Rank P-value |
|-----------------------|-----------------------|---------------------|------------------|
| Total                 | 194.1 (183.5, NR)     | E=735 C=1597 T=2332 | p= <.001         |
| ALP                   | 142.7 (114.0, 171.5)  | E=135 C=227 T=362   |                  |
| LOR                   | 157.5 (133.2, 165.9)  | E=210 C=349 T=559   |                  |
| No Benzo              | NR (NR, NR)           | E=390 C=1021 T=1411 |                  |

| Progression-Free Survival (PFS) | Median Surv. (95% CI) | Sample: Breast      | Log Rank P-value |
|---------------------------------|-----------------------|---------------------|------------------|
| Total                           | 191.3 (172.5, NR)     | E=780 C=1552 T=2332 | p= <.001         |
| ALP                             | 136.6 (92.7, 161.5)   | E=142 C=220 T=362   |                  |
| LOR                             | 133.2 (117.1, 168.3)  | E=227 C=332 T=559   |                  |
| No Benzo                        | NR (NR, NR)           | E=411 C=1000 T=1411 |                  |

| Overall Survival (OS)                                       |                       |         |
|-------------------------------------------------------------|-----------------------|---------|
| Predictors: Cohort, Sex, Clinical Grade, and Clinical Stage |                       |         |
| Cohort                                                      | HR (95% CI)           | P-value |
| No Benzo                                                    | Ref.                  | <.0001  |
| ALP                                                         | 1.867 (1.528 – 2.281) | <.0001  |
| LOR                                                         | 1.248 (1.050 – 1.484) | 0.0119  |
| Progression-Free Survival (PFS)                             |                       |         |
| No Benzo                                                    | Ref.                  | <.0001  |
| ALP                                                         | 1.850 (1.523 – 2.248) | <.0001  |
| LOR                                                         | 1.345 (1.138 – 1.591) | 0.0005  |

**E= event, C= censored, T= Total**
