# Supplementary material for: Lorazepam Stimulates IL6 Production and Is Associated with Poor Survival Outcomes in Pancreatic Cancer
Source: PubMed Central journal article supplement — Clin Cancer Res. 2023 Aug 17;29(18):3793–812. doi: 10.1158/1078-0432.CCR-23-0547 (PMC10502465; doi:10.1158/1078-0432.ccr-23-0547), 2023-08-17
Supplement: ccr-23-0547_supplementary_table_s8_suppts8.pdf [file ccr-23-0547_supplementary_table_s8_suppts8.pdf]

**Supplementary Table S8. Corpus uterine cancer patient characteristics, median survival, and Multivariate Cox Regression Modeling.**

| Patient Characteristics: Corpus Uteri |                | LOR          | ALP         | No Benzo     | Overall      | P-value |
|---------------------------------------|----------------|--------------|-------------|--------------|--------------|---------|
|                                       | N              | 120 (19.0)   | 40 (6.3)    | 470 (74.6)   | 630 (100%)   |         |
| Sex                                   | Female         | 120 (100.0%) | 40 (100.0%) | 470 (100.0%) | 630 (100.0%) |         |
| Grade (Clinical)                      | I              | 21 (17.5%)   | 9 (22.5%)   | 213 (45.4%)  | 243 (38.6%)  | <.001   |
|                                       | II             | 21 (17.5%)   | 8 (20.0%)   | 104 (22.2%)  | 133 (21.1%)  |         |
|                                       | III            | 37 (30.8%)   | 10 (25.0%)  | 97 (20.7%)   | 144 (22.9%)  |         |
|                                       | IV             | 9 (7.5%)     | 3 (7.5%)    | 6 (1.3%)     | 18 (2.9%)    |         |
|                                       | Not Reported   | 32 (26.7%)   | 10 (25.0%)  | 49 (10.4%)   | 91 (14.5%)   |         |
| Grade (Pathological)                  | I              | 23 (19.2%)   | 9 (22.5%)   | 213 (45.4%)  | 245 (39.0%)  | <.001   |
|                                       | II             | 21 (17.5%)   | 6 (15.0%)   | 104 (22.2%)  | 131 (20.8%)  |         |
|                                       | III            | 38 (31.7%)   | 12 (30.0%)  | 96 (20.5%)   | 146 (23.2%)  |         |
|                                       | IV             | 9 (7.5%)     | 3 (7.5%)    | 6 (1.3%)     | 18 (2.9%)    |         |
|                                       | Not Reported   | 29 (24.2%)   | 10 (25.0%)  | 50 (10.7%)   | 89 (14.1%)   |         |
| Stage (Clinical)                      | I              | 29 (24.2%)   | 12 (30.0%)  | 160 (34.0%)  | 201 (31.9%)  | 0.043   |
|                                       | II             | 2 (1.7%)     |             | 9 (1.9%)     | 11 (1.7%)    |         |
|                                       | III            | 2 (1.7%)     |             | 9 (1.9%)     | 11 (1.7%)    |         |
|                                       | IV             | 6 (5.0%)     | 2 (5.0%)    | 4 (0.9%)     | 12 (1.9%)    |         |
|                                       | Not Reported   | 81 (67.5%)   | 26 (65.0%)  | 288 (61.3%)  | 395 (62.7%)  |         |
| Stage (Pathological)                  | I              | 49 (41.2%)   | 11 (28.2%)  | 235 (50.0%)  | 295 (47.0%)  | <.001   |
|                                       | II             | 8 (6.7%)     | 2 (5.1%)    | 25 (5.3%)    | 35 (5.6%)    |         |
|                                       | III            | 16 (13.4%)   | 2 (5.1%)    | 35 (7.4%)    | 53 (8.4%)    |         |
|                                       | IV             | 14 (11.8%)   | 5 (12.8%)   | 15 (3.2%)    | 34 (5.4%)    |         |
|                                       | Not Reported   | 32 (26.9%)   | 19 (48.7%)  | 160 (34.0%)  | 211 (33.6%)  |         |
| Overall Survival Indicator            | Alive          | 48 (40.0%)   | 19 (47.5%)  | 296 (63.0%)  | 363 (57.6%)  | <.001   |
|                                       | Dead           | 72 (60.0%)   | 21 (52.5%)  | 174 (37.0%)  | 267 (42.4%)  |         |
| Progression-Free Survival Indicator   | No Progression | 46 (38.3%)   | 18 (45.0%)  | 286 (60.9%)  | 350 (55.6%)  | <.001   |
|                                       | Progression    | 74 (61.7%)   | 22 (55.0%)  | 184 (39.1%)  | 280 (44.4%)  |         |

| Overall Survival (OS) | Median Surv. (95% CI) | Sample: Corpus Uteri | Log Rank P-value |
|-----------------------|-----------------------|----------------------|------------------|
| Total                 | 150.5 (123.2, 181.2)  | E=267 C=363 T=630    | p= <.001         |
| ALP                   | 52.9 (37.5, 123.2)    | E=21 C=19 T=40       |                  |
| LOR                   | 62.9 (42.7, 90.3)     | E=72 C=48 T=120      |                  |
| No Benzo              | NR (157.8, NR)        | E=174 C=296 T=470    |                  |

| Progression-Free Survival (PFS) | Median Surv. (95% CI) | Sample: Corpus Uteri | Log Rank P-value |
|---------------------------------|-----------------------|----------------------|------------------|
| Total                           | 138.3 (108.6, 162.0)  | E=280 C=350 T=630    | p= <.001         |
| ALP                             | 38.1 (22.1, 113.6)    | E=22 C=18 T=40       |                  |
| LOR                             | 40.6 (23.6, 76.3)     | E=74 C=46 T=120      |                  |
| No Benzo                        | 178.3 (150.1, NR)     | E=184 C=286 T=470    |                  |

| Overall Survival (OS)                                  |                       |         |
|--------------------------------------------------------|-----------------------|---------|
| Predictors: Cohort, Clinical Grade, and Clinical Stage |                       |         |
| Cohort                                                 | HR (95% CI)           | P-value |
| No Benzo                                               | Ref.                  | 0.0564  |
| ALP                                                    | 1.497 (0.931 – 2.405) | 0.0956  |
| LOR                                                    | 1.376 (1.021 – 1.854) | 0.0362  |
| Progression-Free Survival (PFS)                        |                       |         |
| No Benzo                                               | Ref.                  | 0.0149  |
| ALP                                                    | 1.668 (1.051 – 2.646) | 0.0298  |
| LOR                                                    | 1.433 (1.069 – 1.921) | 0.0160  |

**E= event, C= censored, T= Total**
