# Supplementary material for: Lorazepam Stimulates IL6 Production and Is Associated with Poor Survival Outcomes in Pancreatic Cancer
Source: PubMed Central journal article supplement — Clin Cancer Res. 2023 Aug 17;29(18):3793–812. doi: 10.1158/1078-0432.CCR-23-0547 (PMC10502465; doi:10.1158/1078-0432.ccr-23-0547), 2023-08-17
Supplement: ccr-23-0547_supplementary_table_s9_suppts9.pdf [file ccr-23-0547_supplementary_table_s9_suppts9.pdf]

### Supplementary Table S9. Head and neck cancer patient characteristics, median survival, and Multivariate Cox Regression Modeling.

| Patient Characteristics (Head & Neck) |                | LOR         | ALP        | No Benzo    | Overall     | P-value |
|---------------------------------------|----------------|-------------|------------|-------------|-------------|---------|
|                                       | N              | 171 (21.3)  | 86 (10.7)  | 546 (68.0)  | 803 (100%)  |         |
| Sex                                   | Female         | 50 (29.2%)  | 31 (36.0%) | 174 (31.9%) | 255 (31.8%) | 0.540   |
|                                       | Male           | 121 (70.8%) | 55 (64.0%) | 372 (68.1%) | 548 (68.2%) |         |
| Grade (Clinical)                      | I              | 13 (9.1%)   | 8 (10.1%)  | 60 (11.2%)  | 81 (10.7%)  | 0.559   |
|                                       | II             | 67 (46.9%)  | 32 (40.5%) | 205 (38.3%) | 304 (40.2%) |         |
|                                       | III            | 29 (20.3%)  | 19 (24.1%) | 150 (28.0%) | 198 (26.2%) |         |
|                                       | IV             | 3 (2.1%)    | 1 (1.3%)   | 5 (0.9%)    | 9 (1.2%)    |         |
|                                       | Not Reported   | 31 (21.7%)  | 19 (24.1%) | 115 (21.5%) | 165 (21.8%) |         |
| Grade (Pathological)                  | I              | 12 (8.5%)   | 7 (8.9%)   | 60 (11.2%)  | 79 (10.4%)  | 0.493   |
|                                       | II             | 61 (43.0%)  | 33 (41.8%) | 204 (38.1%) | 298 (39.4%) |         |
|                                       | III            | 29 (20.4%)  | 18 (22.8%) | 151 (28.2%) | 198 (26.2%) |         |
|                                       | IV             | 3 (2.1%)    | 1 (1.3%)   | 5 (0.9%)    | 9 (1.2%)    |         |
|                                       | Not Reported   | 37 (26.1%)  | 20 (25.3%) | 115 (21.5%) | 172 (22.8%) |         |
| Stage (Clinical)                      | 0              | 3 (1.8%)    | 1 (1.2%)   | 8 (1.5%)    | 12 (1.5%)   | 0.027   |
|                                       | I              | 27 (15.8%)  | 13 (15.1%) | 64 (11.7%)  | 104 (13.0%) |         |
|                                       | II             | 27 (15.8%)  | 4 (4.7%)   | 63 (11.5%)  | 94 (11.7%)  |         |
|                                       | III            | 26 (15.2%)  | 11 (12.8%) | 53 (9.7%)   | 90 (11.2%)  |         |
|                                       | IV             | 48 (28.1%)  | 23 (26.7%) | 192 (35.2%) | 263 (32.8%) |         |
|                                       | Not Reported   | 40 (23.4%)  | 34 (39.5%) | 166 (30.4%) | 240 (29.9%) |         |
| Stage (Pathological)                  | 0              | 1 (0.6%)    | 1 (1.2%)   | 7 (1.3%)    | 9 (1.1%)    | 0.509   |
|                                       | I              | 7 (4.1%)    | 5 (5.9%)   | 49 (9.0%)   | 61 (7.6%)   |         |
|                                       | II             | 5 (2.9%)    | 1 (1.2%)   | 17 (3.1%)   | 23 (2.9%)   |         |
|                                       | III            | 7 (4.1%)    | 2 (2.4%)   | 20 (3.7%)   | 29 (3.6%)   |         |
|                                       | IV             | 21 (12.4%)  | 10 (11.8%) | 82 (15.0%)  | 113 (14.1%) |         |
|                                       | Not Reported   | 129 (75.9%) | 66 (77.6%) | 371 (67.9%) | 566 (70.7%) |         |
| Overall Survival Indicator            | Alive          | 53 (31.0%)  | 33 (38.4%) | 212 (38.8%) | 298 (37.1%) | 0.175   |
|                                       | Dead           | 118 (69.0%) | 53 (61.6%) | 334 (61.2%) | 505 (62.9%) |         |
| Progression-Free Survival Indicator   | No Progression | 49 (28.7%)  | 32 (37.2%) | 199 (36.4%) | 280 (34.9%) | 0.156   |
|                                       | Progression    | 122 (71.3%) | 54 (62.8%) | 347 (63.6%) | 523 (65.1%) |         |

| Overall Survival (OS) | Median Surv. (95% CI) | Sample: Head & Neck | Log Rank P-value |
|-----------------------|-----------------------|---------------------|------------------|
| Total                 | 55.2 (44.2, 68.0)     | E=505 C=298 T=803   | p= 0.012         |
| ALP                   | 51.3 (30.7, 90.6)     | E=53 C=33 T=86      |                  |
| LOR                   | 35.0 (23.8, 56.5)     | E=118 C=53 T=171    |                  |
| No Benzo              | 63.7 (48.2, 79.1)     | E=334 C=212 T=546   |                  |

| Progression-Free Survival (PFS) | Median Surv. (95% CI) | Sample: Head & Neck | Log Rank P-value |
|---------------------------------|-----------------------|---------------------|------------------|
| Total                           | 38.7 (30.6, 52.1)     | E=523 C=280 T=803   | p= 0.006         |
| ALP                             | 40.3 (23.7, 75.2)     | E=54 C=32 T=86      |                  |
| LOR                             | 29.2 (18.0, 44.0)     | E=122 C=49 T=171    |                  |
| No Benzo                        | 46.8 (32.0, 61.3)     | E=347 C=199 T=546   |                  |

| Overall Survival (OS)                                       |                       |         |
|-------------------------------------------------------------|-----------------------|---------|
| Predictors: Cohort, Sex, Clinical Grade, and Clinical Stage |                       |         |
| Cohort                                                      | HR (95% CI)           | P-value |
| No Benzo                                                    | Ref.                  | <.0001  |
| ALP                                                         | 1.227 (0.907 – 1.660) | 0.1845  |
| LOR                                                         | 1.629 (1.304 – 2.035) | <.0001  |
| Progression-Free Survival (PFS)                             |                       |         |
| No Benzo                                                    | Ref.                  | <.0001  |
| ALP                                                         | 1.235 (0.917 – 1.662) | 0.1647  |
| LOR                                                         | 1.635 (1.313 – 2.036) | <.0001  |

E= event, C= censored, T= Total
