# Supplementary material for: Lorazepam Stimulates IL6 Production and Is Associated with Poor Survival Outcomes in Pancreatic Cancer
Source: PubMed Central journal article supplement — Clin Cancer Res. 2023 Aug 17;29(18):3793–812. doi: 10.1158/1078-0432.CCR-23-0547 (PMC10502465; doi:10.1158/1078-0432.ccr-23-0547), 2023-08-17
Supplement: ccr-23-0547_supplementary_table_s10_suppts10.pdf [file ccr-23-0547_supplementary_table_s10_suppts10.pdf]

## Supplementary Table S10. Invasive nevi and melanoma patient characteristics, median survival, and Multivariate Cox Regression Modeling.

| Patient Characteristics: Invasive Nevi & Melanoma |                | LOR         | ALP        | No Benzo    | Overall     | P-value |
|---------------------------------------------------|----------------|-------------|------------|-------------|-------------|---------|
|                                                   | N              | 130 (18.6)  | 76 (10.9)  | 494 (70.6)  | 700 (100%)  |         |
| Sex                                               | Female         | 54 (41.5%)  | 43 (56.6%) | 231 (46.8%) | 328 (46.9%) | 0.113   |
|                                                   | Male           | 76 (58.5%)  | 33 (43.4%) | 263 (53.2%) | 372 (53.1%) |         |
| Grade (Clinical)                                  | I              |             |            | 1 (0.2%)    | 1 (0.1%)    | 0.707   |
|                                                   | III            |             | 1 (1.3%)   | 2 (0.4%)    | 3 (0.4%)    |         |
|                                                   | IV             | 1 (0.8%)    |            | 1 (0.2%)    | 2 (0.3%)    |         |
|                                                   | Not Reported   | 129 (99.2%) | 75 (98.7%) | 490 (99.2%) | 694 (99.1%) |         |
| Grade (Pathological)                              | I              |             |            | 1 (0.2%)    | 1 (0.1%)    | 0.527   |
|                                                   | III            |             | 1 (1.3%)   | 1 (0.2%)    | 2 (0.3%)    |         |
|                                                   | IV             | 1 (0.8%)    |            | 1 (0.2%)    | 2 (0.3%)    |         |
|                                                   | Not Reported   | 129 (99.2%) | 75 (98.7%) | 491 (99.4%) | 695 (99.3%) |         |
| Stage (Clinical)                                  | 0              |             |            | 1 (0.2%)    | 1 (0.1%)    | <.001   |
|                                                   | I              | 32 (24.6%)  | 34 (44.7%) | 133 (27.0%) | 199 (28.5%) |         |
|                                                   | II             | 20 (15.4%)  | 14 (18.4%) | 47 (9.5%)   | 81 (11.6%)  |         |
|                                                   | III            | 6 (4.6%)    | 4 (5.3%)   | 9 (1.8%)    | 19 (2.7%)   |         |
|                                                   | IV             | 4 (3.1%)    | 1 (1.3%)   | 13 (2.6%)   | 18 (2.6%)   |         |
|                                                   | Not Reported   | 68 (52.3%)  | 23 (30.3%) | 290 (58.8%) | 381 (54.5%) |         |
| Stage (Pathological)                              | 0              |             | 1 (1.3%)   | 3 (0.6%)    | 4 (0.6%)    | 0.002   |
|                                                   | I              | 36 (27.7%)  | 28 (36.8%) | 219 (44.4%) | 283 (40.5%) |         |
|                                                   | II             | 16 (12.3%)  | 15 (19.7%) | 70 (14.2%)  | 101 (14.4%) |         |
|                                                   | III            | 18 (13.8%)  | 13 (17.1%) | 44 (8.9%)   | 75 (10.7%)  |         |
|                                                   | IV             | 1 (0.8%)    |            | 9 (1.8%)    | 10 (1.4%)   |         |
|                                                   | Not Reported   | 59 (45.4%)  | 19 (25.0%) | 148 (30.0%) | 226 (32.3%) |         |
| Overall Survival Indicator                        | Alive          | 49 (37.7%)  | 49 (64.5%) | 297 (60.1%) | 395 (56.4%) | <.001   |
|                                                   | Dead           | 81 (62.3%)  | 27 (35.5%) | 197 (39.9%) | 305 (43.6%) |         |
| Progression-Free Survival Indicator               | No Progression | 43 (33.1%)  | 47 (61.8%) | 287 (58.1%) | 377 (53.9%) | <.001   |
|                                                   | Progression    | 87 (66.9%)  | 29 (38.2%) | 207 (41.9%) | 323 (46.1%) |         |

| Overall Survival (OS) | Median Surv. (95% CI) | Sample: Invasive Nevi & Melanoma | Log Rank P-value |
|-----------------------|-----------------------|----------------------------------|------------------|
| Total                 | 144.7 (120.0, 193.7)  | E=305 C=395 T=700                | p= <.001         |
| ALP                   | NR (69.4, NR)         | E=27 C=49 T=76                   |                  |
| LOR                   | 72.2 (54.1, 97.4)     | E=81 C=49 T=130                  |                  |
| No Benzo              | 193.7 (150.3, NR)     | E=197 C=297 T=494                |                  |

| Progression-Free Survival (PFS) | Median Surv. (95% CI) | Sample: Invasive Nevi & Melanoma | Log Rank P-value |
|---------------------------------|-----------------------|----------------------------------|------------------|
| Total                           | 132.7 (103.7, 165.9)  | E=323 C=377 T=700                | p= <.001         |
| ALP                             | 142.3 (69.4, NR)      | E=29 C=47 T=76                   |                  |
| LOR                             | 44.7 (34.4, 63.5)     | E=87 C=43 T=130                  |                  |
| No Benzo                        | 192.2 (134.3, NR)     | E=207 C=287 T=494                |                  |

| Overall Survival (OS)                                       |                       |         |
|-------------------------------------------------------------|-----------------------|---------|
| Predictors: Cohort, Sex, Clinical Grade, and Clinical Stage |                       |         |
| Cohort                                                      | HR (95% CI)           | P-value |
| No Benzo                                                    | Ref.                  | <.0001  |
| ALP                                                         | 1.194 (0.791 – 1.803) | 0.3984  |
| LOR                                                         | 1.978 (1.519 – 2.576) | <.0001  |
| Progression-Free Survival (PFS)                             |                       |         |
| No Benzo                                                    | Ref.                  | <.0001  |
| ALP                                                         | 1.205 (0.807 – 1.799) | 0.3623  |
| LOR                                                         | 2.195 (1.699 – 2.835) | <.0001  |

E= event, C= censored, T= Total
