# Supplementary material for: Lorazepam Stimulates IL6 Production and Is Associated with Poor Survival Outcomes in Pancreatic Cancer
Source: PubMed Central journal article supplement — Clin Cancer Res. 2023 Aug 17;29(18):3793–812. doi: 10.1158/1078-0432.CCR-23-0547 (PMC10502465; doi:10.1158/1078-0432.ccr-23-0547), 2023-08-17
Supplement: ccr-23-0547_supplementary_table_s11_suppts11.pdf [file ccr-23-0547_supplementary_table_s11_suppts11.pdf]

**Supplementary Table S11. Renal cancer patient characteristics, median survival, and Multivariate Cox Regression Modeling.**

| Patient Characteristics: Kidney     |                | LOR        | ALP        | No Benzo    | Overall     | P-value |
|-------------------------------------|----------------|------------|------------|-------------|-------------|---------|
|                                     | N              | 73 (12.4)  | 38 (6.5)   | 477 (81.1)  | 588 (100%)  |         |
| Sex                                 | Female         | 25 (34.2%) | 21 (55.3%) | 185 (38.8%) | 231 (39.3%) | 0.087   |
|                                     | Male           | 48 (65.8%) | 17 (44.7%) | 292 (61.2%) | 357 (60.7%) |         |
| Grade (Clinical)                    | I              |            | 3 (7.9%)   | 23 (4.9%)   | 26 (4.5%)   | 0.288   |
|                                     | II             | 18 (24.7%) | 11 (28.9%) | 131 (28.0%) | 160 (27.6%) |         |
|                                     | III            | 24 (32.9%) | 13 (34.2%) | 135 (28.8%) | 172 (29.7%) |         |
|                                     | IV             | 6 (8.2%)   | 2 (5.3%)   | 59 (12.6%)  | 67 (11.6%)  |         |
|                                     | Not Reported   | 25 (34.2%) | 9 (23.7%)  | 120 (25.6%) | 154 (26.6%) |         |
| Grade (Pathological)                | I              |            | 3 (7.9%)   | 23 (4.9%)   | 26 (4.5%)   | 0.435   |
|                                     | II             | 18 (24.7%) | 10 (26.3%) | 129 (27.5%) | 157 (27.1%) |         |
|                                     | III            | 23 (31.5%) | 13 (34.2%) | 136 (29.0%) | 172 (29.7%) |         |
|                                     | IV             | 8 (11.0%)  | 2 (5.3%)   | 60 (12.8%)  | 70 (12.1%)  |         |
|                                     | Not Reported   | 24 (32.9%) | 10 (26.3%) | 121 (25.8%) | 155 (26.7%) |         |
| Stage (Clinical)                    | I              | 13 (17.8%) | 9 (24.3%)  | 133 (27.9%) | 155 (26.4%) | 0.412   |
|                                     | II             | 4 (5.5%)   | 1 (2.7%)   | 44 (9.2%)   | 49 (8.3%)   |         |
|                                     | III            | 4 (5.5%)   | 1 (2.7%)   | 24 (5.0%)   | 29 (4.9%)   |         |
|                                     | IV             | 16 (21.9%) | 7 (18.9%)  | 78 (16.4%)  | 101 (17.2%) |         |
|                                     | Not Reported   | 36 (49.3%) | 19 (51.4%) | 198 (41.5%) | 253 (43.1%) |         |
| Stage (Pathological)                | I              | 10 (13.7%) | 7 (18.9%)  | 106 (22.2%) | 123 (21.0%) | 0.482   |
|                                     | II             | 3 (4.1%)   | 2 (5.4%)   | 32 (6.7%)   | 37 (6.3%)   |         |
|                                     | III            | 5 (6.8%)   | 2 (5.4%)   | 47 (9.9%)   | 54 (9.2%)   |         |
|                                     | IV             | 9 (12.3%)  | 5 (13.5%)  | 39 (8.2%)   | 53 (9.0%)   |         |
|                                     | Not Reported   | 46 (63.0%) | 21 (56.8%) | 253 (53.0%) | 320 (54.5%) |         |
| Overall Survival Indicator          | Alive          | 26 (35.6%) | 16 (42.1%) | 229 (48.0%) | 271 (46.1%) | 0.124   |
|                                     | Dead           | 47 (64.4%) | 22 (57.9%) | 248 (52.0%) | 317 (53.9%) |         |
| Progression-Free Survival Indicator | No Progression | 20 (27.4%) | 13 (34.2%) | 205 (43.0%) | 238 (40.5%) | 0.030   |
|                                     | Progression    | 53 (72.6%) | 25 (65.8%) | 272 (57.0%) | 350 (59.5%) |         |

| Overall Survival (OS) | Median Surv. (95% CI) | Sample: Kidney    | Log Rank P-value |
|-----------------------|-----------------------|-------------------|------------------|
| Total                 | 82.4 (65.6, 96.0)     | E=317 C=271 T=588 | p= 0.272         |
| ALP                   | 66.9 (24.0, 120.6)    | E=22 C=16 T=38    |                  |
| LOR                   | 66.9 (48.3, 96.0)     | E=47 C=26 T=73    |                  |
| No Benzo              | 86.8 (66.2, 105.9)    | E=248 C=229 T=477 |                  |

| Progression-Free Survival (PFS) | Median Surv. (95% CI) | Sample: Kidney    | Log Rank P-value |
|---------------------------------|-----------------------|-------------------|------------------|
| Total                           | 49.1 (38.3, 66.8)     | E=350 C=238 T=588 | p= 0.051         |
| ALP                             | 35.6 (13.9, 95.7)     | E=25 C=13 T=38    |                  |
| LOR                             | 36.8 (26.1, 53.8)     | E=53 C=20 T=73    |                  |
| No Benzo                        | 59.8 (39.1, 79.2)     | E=272 C=205 T=477 |                  |

| Overall Survival (OS)                                       |                       |         |
|-------------------------------------------------------------|-----------------------|---------|
| Predictors: Cohort, Sex, Clinical Grade, and Clinical Stage |                       |         |
| Cohort                                                      | HR (95% CI)           | P-value |
| No Benzo                                                    | Ref.                  | 0.6198  |
| ALP                                                         | 1.153 (0.741 – 1.795) | 0.5268  |
| LOR                                                         | 0.898 (0.651 – 1.240) | 0.5132  |
| Progression-Free Survival (PFS)                             |                       |         |
| No Benzo                                                    | Ref.                  | 0.7907  |
| ALP                                                         | 1.152 (0.760 – 1.747) | 0.5058  |
| LOR                                                         | 1.039 (0.768 – 1.407) | 0.8034  |

**E= event, C= censored, T= Total**
