# Supplementary material for: Lorazepam Stimulates IL6 Production and Is Associated with Poor Survival Outcomes in Pancreatic Cancer
Source: PubMed Central journal article supplement — Clin Cancer Res. 2023 Aug 17;29(18):3793–812. doi: 10.1158/1078-0432.CCR-23-0547 (PMC10502465; doi:10.1158/1078-0432.ccr-23-0547), 2023-08-17
Supplement: ccr-23-0547_supplementary_table_s13_suppts13.pdf [file ccr-23-0547_supplementary_table_s13_suppts13.pdf]

### Supplementary Table S13. Colon cancer patient characteristics, median survival, and Multivariate Cox Regression Modeling.

| Patient Characteristics: Colon      | LOR            | ALP         | No Benzo   | Overall     | P-value     |       |
|-------------------------------------|----------------|-------------|------------|-------------|-------------|-------|
|                                     | N              | 177 (22.7)  | 64 (8.2)   | 539 (69.1)  | 780 (100%)  |       |
| Sex                                 | Female         | 96 (54.2%)  | 43 (67.2%) | 267 (49.5%) | 406 (52.1%) | 0.023 |
|                                     | Male           | 81 (45.8%)  | 21 (32.8%) | 272 (50.5%) | 374 (47.9%) |       |
| Grade (Clinical)                    | I              | 8 (4.7%)    | 3 (4.7%)   | 23 (4.3%)   | 34 (4.4%)   | 0.948 |
|                                     | II             | 98 (57.6%)  | 42 (65.6%) | 332 (61.8%) | 472 (61.2%) |       |
|                                     | III            | 34 (20.0%)  | 10 (15.6%) | 103 (19.2%) | 147 (19.1%) |       |
|                                     | IV             | 1 (0.6%)    | 1 (1.6%)   | 4 (0.7%)    | 6 (0.8%)    |       |
|                                     | Not Reported   | 29 (17.1%)  | 8 (12.5%)  | 75 (14.0%)  | 112 (14.5%) |       |
| Grade (Pathological)                | I              | 8 (4.7%)    | 3 (4.8%)   | 23 (4.3%)   | 34 (4.4%)   | 0.881 |
|                                     | II             | 97 (57.1%)  | 41 (65.1%) | 330 (61.6%) | 468 (60.9%) |       |
|                                     | III            | 32 (18.8%)  | 9 (14.3%)  | 102 (19.0%) | 143 (18.6%) |       |
|                                     | IV             | 1 (0.6%)    | 1 (1.6%)   | 4 (0.7%)    | 6 (0.8%)    |       |
|                                     | Not Reported   | 32 (18.8%)  | 9 (14.3%)  | 77 (14.4%)  | 118 (15.3%) |       |
| Stage (Clinical)                    | 0              | 2 (1.1%)    | 1 (1.6%)   | 2 (0.4%)    | 5 (0.6%)    | 0.618 |
|                                     | I              | 8 (4.5%)    | 4 (6.3%)   | 16 (3.0%)   | 28 (3.6%)   |       |
|                                     | II             | 3 (1.7%)    | 1 (1.6%)   | 13 (2.4%)   | 17 (2.2%)   |       |
|                                     | III            | 3 (1.7%)    | 1 (1.6%)   | 4 (0.7%)    | 8 (1.0%)    |       |
|                                     | IV             | 29 (16.4%)  | 6 (9.5%)   | 86 (16.0%)  | 121 (15.5%) |       |
|                                     | Not Reported   | 132 (74.6%) | 50 (79.4%) | 418 (77.6%) | 600 (77.0%) |       |
| Stage (Pathological)                | 0              |             |            | 5 (0.9%)    | 5 (0.6%)    | <.001 |
|                                     | I              | 4 (2.3%)    | 4 (6.3%)   | 28 (5.2%)   | 36 (4.6%)   |       |
|                                     | II             | 4 (2.3%)    | 3 (4.8%)   | 60 (11.1%)  | 67 (8.6%)   |       |
|                                     | III            | 14 (8.0%)   | 6 (9.5%)   | 77 (14.3%)  | 97 (12.5%)  |       |
|                                     | IV             | 22 (12.5%)  | 5 (7.9%)   | 76 (14.1%)  | 103 (13.2%) |       |
|                                     | Not Reported   | 132 (75.0%) | 45 (71.4%) | 293 (54.4%) | 470 (60.4%) |       |
| Overall Survival Indicator          | Alive          | 45 (25.4%)  | 21 (32.8%) | 201 (37.3%) | 267 (34.2%) | 0.015 |
|                                     | Dead           | 132 (74.6%) | 43 (67.2%) | 338 (62.7%) | 513 (65.8%) |       |
| Progression-Free Survival Indicator | No Progression | 36 (20.3%)  | 20 (31.3%) | 179 (33.2%) | 235 (30.1%) | 0.005 |
|                                     | Progression    | 141 (79.7%) | 44 (68.8%) | 360 (66.8%) | 545 (69.9%) |       |

| Overall Survival (OS) | Median Surv. (95% CI) | Sample: Colon     | Log Rank P-value |
|-----------------------|-----------------------|-------------------|------------------|
| Total                 | 44.4 (39.2, 49.0)     | E=513 C=267 T=780 | p= 0.005         |
| ALP                   | 57.7 (35.1, 85.3)     | E=43 C=21 T=64    |                  |
| LOR                   | 43.0 (31.1, 50.3)     | E=132 C=45 T=177  |                  |
| No Benzo              | 43.9 (38.9, 50.0)     | E=338 C=201 T=539 |                  |

| Progression-Free Survival (PFS) | Median Surv. (95% CI) | Sample: Colon     | Log Rank P-value |
|---------------------------------|-----------------------|-------------------|------------------|
| Total                           | 31.0 (27.8, 33.6)     | E=545 C=235 T=780 | p= <.001         |
| ALP                             | 38.1 (22.3, 59.8)     | E=44 C=20 T=64    |                  |
| LOR                             | 23.8 (20.2, 30.5)     | E=141 C=36 T=177  |                  |
| No Benzo                        | 33.1 (29.2, 38.1)     | E=360 C=179 T=539 |                  |

| Overall Survival (OS)                                       |                       |         |
|-------------------------------------------------------------|-----------------------|---------|
| Predictors: Cohort, Sex, Clinical Grade, and Clinical Stage |                       |         |
| Cohort                                                      | HR (95% CI)           | P-value |
| No Benzo                                                    | Ref.                  | <.0001  |
| ALP                                                         | 1.369 (0.988 – 1.897) | 0.0593  |
| LOR                                                         | 1.620 (1.317 – 1.993) | <.0001  |
| Progression-Free Survival (PFS)                             |                       |         |
| No Benzo                                                    | Ref.                  | <.0001  |
| ALP                                                         | 1.290 (0.936 – 1.778) | 0.1200  |
| LOR                                                         | 1.782 (1.457 – 2.179) | <.0001  |

E= event, C= censored, T= Total
