# Supplementary material for: Lorazepam Stimulates IL6 Production and Is Associated with Poor Survival Outcomes in Pancreatic Cancer
Source: PubMed Central journal article supplement — Clin Cancer Res. 2023 Aug 17;29(18):3793–812. doi: 10.1158/1078-0432.CCR-23-0547 (PMC10502465; doi:10.1158/1078-0432.ccr-23-0547), 2023-08-17
Supplement: ccr-23-0547_supplementary_table_s14_suppts14.pdf [file ccr-23-0547_supplementary_table_s14_suppts14.pdf]

### Supplementary Table S14. Prostate cancer patient characteristics, median survival, and Multivariate Cox Regression Modeling.

| Patient Characteristics: Prostate   |                            | LOR          | ALP          | No Benzo     | Overall      | P-value     |
|-------------------------------------|----------------------------|--------------|--------------|--------------|--------------|-------------|
|                                     | N                          | 175 (21.3)   | 118 (14.4)   | 528 (64.3)   | 821 (100%)   |             |
| Sex                                 | Male                       | 175 (100.0%) | 118 (100.0%) | 528 (100.0%) | 821 (100.0%) |             |
| Grade (Clinical)                    | I                          | 14 (8.2%)    | 2 (1.7%)     | 10 (1.9%)    | 26 (3.2%)    | <.001       |
|                                     | II                         | 61 (35.7%)   | 35 (30.2%)   | 212 (40.8%)  | 308 (38.2%)  |             |
|                                     | III                        | 78 (45.6%)   | 73 (62.9%)   | 282 (54.2%)  | 433 (53.7%)  |             |
|                                     | IV                         | 3 (1.8%)     | 1 (0.9%)     | 8 (1.5%)     | 12 (1.5%)    |             |
|                                     | Not Reported               | 15 (8.8%)    | 5 (4.3%)     | 8 (1.5%)     | 28 (3.5%)    |             |
| Grade (Pathological)                | I                          | 9 (5.2%)     | 1 (0.9%)     |              | 10 (1.2%)    | <.001       |
|                                     | II                         | 53 (30.8%)   | 33 (28.2%)   | 204 (38.9%)  | 290 (35.7%)  |             |
|                                     | III                        | 75 (43.6%)   | 73 (62.4%)   | 277 (52.9%)  | 425 (52.3%)  |             |
|                                     | IV                         | 1 (0.6%)     |              | 1 (0.2%)     | 2 (0.2%)     |             |
|                                     | Not Reported               | 34 (19.8%)   | 10 (8.5%)    | 42 (8.0%)    | 86 (10.6%)   |             |
| Stage (Clinical)                    | 0                          |              |              | 1 (0.2%)     | 1 (0.1%)     | <.001       |
|                                     | I                          | 17 (9.8%)    | 11 (9.5%)    | 5 (0.9%)     | 33 (4.0%)    |             |
|                                     | II                         | 61 (35.1%)   | 46 (39.7%)   | 414 (78.4%)  | 521 (63.7%)  |             |
|                                     | III                        | 2 (1.1%)     | 1 (0.9%)     | 8 (1.5%)     | 11 (1.3%)    |             |
|                                     | IV                         | 25 (14.4%)   | 10 (8.6%)    | 19 (3.6%)    | 54 (6.6%)    |             |
|                                     | Not Reported               | 69 (39.7%)   | 48 (41.4%)   | 81 (15.3%)   | 198 (24.2%)  |             |
| Stage (Pathological)                | I                          |              |              | 2 (0.4%)     | 2 (0.2%)     | <.001       |
|                                     | II                         | 21 (12.1%)   | 20 (17.1%)   | 161 (30.5%)  | 202 (24.7%)  |             |
|                                     | III                        | 11 (6.3%)    | 7 (6.0%)     | 44 (8.3%)    | 62 (7.6%)    |             |
|                                     | IV                         | 5 (2.9%)     | 4 (3.4%)     | 14 (2.7%)    | 23 (2.8%)    |             |
|                                     | Not Reported               | 137 (78.7%)  | 86 (73.5%)   | 307 (58.1%)  | 530 (64.7%)  |             |
|                                     | Overall Survival Indicator | Alive        | 98 (56.0%)   | 68 (57.6%)   | 383 (72.5%)  | 549 (66.9%) |
|                                     | Dead                       | 77 (44.0%)   | 50 (42.4%)   | 145 (27.5%)  | 272 (33.1%)  |             |
| Progression-Free Survival Indicator | No Progression             | 87 (49.7%)   | 63 (53.4%)   | 339 (64.2%)  | 489 (59.6%)  | 0.001       |
|                                     | Progression                | 88 (50.3%)   | 55 (46.6%)   | 189 (35.8%)  | 332 (40.4%)  |             |

| Overall Survival (OS) | Median Surv. (95% CI) | Sample: Prostate  | Log Rank P-value |
|-----------------------|-----------------------|-------------------|------------------|
| Total                 | 202.2 (188.0, NR)     | E=272 C=549 T=821 | p= <.001         |
| ALP                   | 155.6 (117.6, 202.2)  | E=50 C=68 T=118   |                  |
| LOR                   | 116.5 (82.2, 136.6)   | E=77 C=98 T=175   |                  |
| No Benzo              | NR (200.1, NR)        | E=145 C=383 T=528 |                  |

| Progression-Free Survival (PFS) | Median Surv. (95% CI) | Sample: Prostate  | Log Rank P-value |
|---------------------------------|-----------------------|-------------------|------------------|
| Total                           | 157.3 (146.7, 184.4)  | E=332 C=489 T=821 | p= <.001         |
| ALP                             | 127.5 (107.0, 181.1)  | E=55 C=63 T=118   |                  |
| LOR                             | 90.6 (67.4, 116.7)    | E=88 C=87 T=175   |                  |
| No Benzo                        | 197.0 (174.1, NR)     | E=189 C=339 T=528 |                  |

| Overall Survival (OS)                                  |                       |         |
|--------------------------------------------------------|-----------------------|---------|
| Predictors: Cohort, Clinical Grade, and Clinical Stage |                       |         |
| Cohort                                                 | HR (95% CI)           | P-value |
| No Benzo                                               | Ref.                  | <.0001  |
| ALP                                                    | 1.464 (1.038 – 2.064) | 0.0298  |
| LOR                                                    | 2.160 (1.589 – 2.936) | <.0001  |
| Progression-Free Survival (PFS)                        |                       |         |
| No Benzo                                               | Ref.                  | <.0001  |
| ALP                                                    | 1.237 (0.899 – 1.702) | 0.1916  |
| LOR                                                    | 1.899 (1.433 – 2.517) | <.0001  |

E= event, C= censored, T= Total
